# Supplementary material
Source: MDPI journal article supplement (https://www.mdpi.com/2075-163X/13/6/712)
Supplement: s1 [file s1]

Archive with 2 entries (2 files):
- minerals-2282195-Supplementary File 1. The locations of Mn deposits .pdf
- minerals-2282195-Supplementary File 2. Original data and references.xlsx
