# Supplementary material
Source: MDPI journal article supplement (https://www.mdpi.com/2075-163X/13/6/712)
Supplement: s1 [file s1 › minerals-2282195-Supplementary File 2. Original data and references.xlsx]

## Sheet: Major element
References	Deposits	Sample No.	Rock types	Mn	Fe	Ti	Al	TiO2	Al2O3	Fe2O3	MnO	Mn	Fe		Ti	Al	Mn	Fe	Al/Mn	Fe/Mn
Wu et al., 2016	YLZ	YLZ-03-1	Mn ore	25.1	2.64	0.0599349	0.936792	0.1	1.77	—	—	25.1	2.64		0.0599349	0.936792	25.1	2.64	0.0373224	0.105179
Wu et al., 2016	YLZ	YLZ-09	Mn ore	20.3	2.6	0.25772	3.52488	0.43	6.66	—	—	20.3	2.6		0.25772	3.52488	20.3	2.6	0.173639	0.128079
Wu et al., 2016	YLZ	YLZ-01-4	Mn ore	27.2	2.82	0.125863	1.38137	0.21	2.61	—	—	27.2	2.82		0.125863	1.38137	27.2	2.82	0.0507857	0.103676
He,2016	YLZ	YLZ-1	Mn ore			0.0719219	1.04264	0.12	1.97	3.19	39.8	30.8236	2.23118		0.0719219	1.04264	30.8236	2.23118	0.0338262	0.0723856
He,2016	YLZ	YLZ-2	Mn ore			4.3273	3.82127	7.22	7.22	3.61	22.5	17.4254	2.52495		4.3273	3.82127	17.4254	2.52495	0.219293	0.1449
He,2016	YLZ	YLZ-3	Mn ore			2.75101	2.42931	4.59	4.59	3.01	30.5	23.6211	2.10529		2.75101	2.42931	23.6211	2.10529	0.102845	0.0891274
He,2016	YLZ	YLZ-4	Mn ore			3.30241	2.91623	5.51	5.51	4.7	27.5	21.2977	3.28732		3.30241	2.91623	21.2977	3.28732	0.136927	0.154351
He,2016	YLZ	YLZ-5	Mn ore			2.96678	2.61984	4.95	4.95	3.31	27.6	21.3751	2.31512		2.96678	2.61984	21.3751	2.31512	0.122565	0.108309
Zhang，2014	YLZ	Y-7	Mn ore			0.0839088	1.03206	0.14	1.95	3.39	34.08	26.3937	2.37107		0.0839088	1.03206	26.3937	2.37107	0.0391025	0.0898348
Zhang，2014	YLZ	Y-19	Mn ore			0.101889	1.04264	0.17	1.97	3.88	37.09	28.7248	2.71379		0.101889	1.04264	28.7248	2.71379	0.0362977	0.0944756
Wu et al., 2016	DW	DW-02-1	Mn ore	15.2	3.24	0.215766	3.53546	0.36	6.68	—	—	15.2	3.24		0.215766	3.53546	15.2	3.24	0.232596	0.213158
Wu et al., 2016	DW	DW-02-3	Mn ore	17.1	3.54	0.161824	2.74157	0.27	5.18	—	—	17.1	3.54		0.161824	2.74157	17.1	3.54	0.160326	0.207018
Wu et al., 2016	DW	DW-02-4	Mn ore	16.7	1.75	0.173811	3.24966	0.29	6.14	—	—	16.7	1.75		0.173811	3.24966	16.7	1.75	0.194591	0.10479
Wu et al., 2016	DW	DW-02-5	Mn ore	16.8	2.13	0.173811	3.42961	0.29	6.48	—	—	16.8	2.13		0.173811	3.42961	16.8	2.13	0.204144	0.126786
Wu et al., 2016	DW	DW-02-6	Mn ore	25.7	2.58	0.0539414	0.905037	0.09	1.71	—	—	25.7	2.58		0.0539414	0.905037	25.7	2.58	0.0352154	0.100389
Wu et al., 2016	DW	DW-02-7	Mn ore	19.6	3.17	0.161824	3.16498	0.27	5.98	—	—	19.6	3.17		0.161824	3.16498	19.6	3.17	0.161479	0.161735
Wu et al., 2016	DW	DW-03-d2	Mn ore	18.6	2.82	0.0659284	1.39725	0.11	2.64	—	—	18.6	2.82		0.0659284	1.39725	18.6	2.82	0.0751209	0.151613
Wu et al., 2016	DW	DW-03-01	Mn ore	22.6	4.97	0.0659284	1.22789	0.11	2.32	—	—	22.6	4.97		0.0659284	1.22789	22.6	4.97	0.0543312	0.219912
Wu et al., 2016	DW	DW-03-02	Mn ore	23.6	3.65	0.0779154	1.02677	0.13	1.94	—	—	23.6	3.65		0.0779154	1.02677	23.6	3.65	0.0435071	0.154661
Wu et al., 2016	DW	DW-03-03	Mn ore	22.2	3.27	0.125863	1.80478	0.21	3.41	—	—	22.2	3.27		0.125863	1.80478	22.2	3.27	0.0812964	0.147297
Wu et al., 2016	DW	DW-03-04	Mn ore	17.1	2.44	0.161824	3.40315	0.27	6.43	—	—	17.1	2.44		0.161824	3.40315	17.1	2.44	0.199015	0.14269
Wu et al., 2016	DW	DW-03-05	Mn ore	17.9	2.86	0.167818	3.38727	0.28	6.4	—	—	17.9	2.86		0.167818	3.38727	17.9	2.86	0.189233	0.159777
Wu et al., 2016	DW	DW-03-07	Mn ore	27.2	3.75	0.0719219	1.15379	0.12	2.18	—	—	27.2	3.75		0.0719219	1.15379	27.2	3.75	0.0424187	0.137868
Wu et al., 2016	DW	DW-03-08	Mn ore	24.2	2.65	0.0599349	0.926207	0.1	1.75	—	—	24.2	2.65		0.0599349	0.926207	24.2	2.65	0.038273	0.109504
Wu et al., 2016	DW	DW-03-09	Mn ore	25.1	3.39	0.0719219	1.27023	0.12	2.4	—	—	25.1	3.39		0.0719219	1.27023	25.1	3.39	0.0506066	0.13506
Wu et al., 2016	DW	DW-03-10	Mn ore	24.4	3.72	0.0958958	1.40254	0.16	2.65	—	—	24.4	3.72		0.0958958	1.40254	24.4	3.72	0.0574812	0.152459
Wu et al., 2016	DW	DW-03-11	Mn ore	23.6	3.19	0.0779154	1.27552	0.13	2.41	—	—	23.6	3.19		0.0779154	1.27552	23.6	3.19	0.0540474	0.135169
Wu et al., 2016	DTP	DTP-03	Mn ore	24.6	1.5	0.0599349	0.846818	0.1	1.6	—	—	24.6	1.5		0.0599349	0.846818	24.6	1.5	0.0344235	0.0609756
Wu et al., 2016	DTP	DTP-04	Mn ore	18.8	1.27	0.101889	2.33404	0.17	4.41	—	—	18.8	1.27		0.101889	2.33404	18.8	1.27	0.124151	0.0675532
Wu et al., 2016	DTP	DTP-11	Mn ore	15.9	2.41	0.185798	2.75216	0.31	5.2	—	—	15.9	2.41		0.185798	2.75216	15.9	2.41	0.173092	0.151572
Wu et al., 2016	DTP	DTP-18	Mn ore	15.2	2.4	0.227753	4.19175	0.38	7.92	—	—	15.2	2.4		0.227753	4.19175	15.2	2.4	0.275773	0.157895
Wu et al., 2016	XS	RX-02-1	Mn ore	18	2.46	0.197785	3.78951	0.33	7.16	—	—	18	2.46		0.197785	3.78951	18	2.46	0.210528	0.136667
Wu et al., 2016	XS	RX-02-2	Mn ore	13.7	7.18	0.203779	3.75246	0.34	7.09	—	—	13.7	7.18		0.203779	3.75246	13.7	7.18	0.273902	0.524088
Wu et al., 2016	XS	RX-02-3	Mn ore	22.7	1.57	0.0958958	1.79949	0.16	3.4	—	—	22.7	1.57		0.0958958	1.79949	22.7	1.57	0.0792726	0.069163
Wu et al., 2016	XS	RX-02-5	Mn ore	24.5	2.18	0.113876	1.88946	0.19	3.57	—	—	24.5	2.18		0.113876	1.88946	24.5	2.18	0.0771209	0.0889796
Wu et al., 2016	XS	RX-02-6	Mn ore	25.8	2	0.107883	1.32315	0.18	2.5	—	—	25.8	2		0.107883	1.32315	25.8	2	0.051285	0.0775194
Wu et al., 2016	XS	RX-02-7	Mn ore	26.5	2.55	0.0839088	1.42901	0.14	2.7	—	—	26.5	2.55		0.0839088	1.42901	26.5	2.55	0.0539247	0.0962264
Wu et al., 2016	XS	RX-02-8	Mn ore	19.1	3.93	0.13785	2.61984	0.23	4.95	—	—	19.1	3.93		0.13785	2.61984	19.1	3.93	0.137165	0.205759
Wu et al., 2016	XS	RX-02-9	Mn ore	26.5	2.75	0.125863	2.41872	0.21	4.57	—	—	26.5	2.75		0.125863	2.41872	26.5	2.75	0.0912726	0.103774
Wu et al., 2016	XS	RX-02-10	Mn ore	25.7	2.48	0.125863	2.04824	0.21	3.87	—	—	25.7	2.48		0.125863	2.04824	25.7	2.48	0.0796981	0.0964981
Wu et al., 2016	XS	RX-03-1	Mn ore	23	3.52	0.11987	2.54045	0.2	4.8	—	—	23	3.52		0.11987	2.54045	23	3.52	0.110455	0.153043
Wu et al., 2016	XS	RX-03-2	Mn ore	22.5	3.6	0.185798	2.62514	0.31	4.96	—	—	22.5	3.6		0.185798	2.62514	22.5	3.6	0.116673	0.16
Wu et al., 2016	XS	RX-03-3	Mn ore	17	3.5	0.173811	4.00121	0.29	7.56	—	—	17	3.5		0.173811	4.00121	17	3.5	0.235366	0.205882
He, 2016	XS	RX-1	Mn ore			0.185798	3.08559	0.31	5.83	3.31	27.5	21.2977	2.31512		0.185798	3.08559	21.2977	2.31512	0.144879	0.108703
He, 2016	XS	RX-3	Mn ore			0.227753	3.37139	0.38	6.37	3.73	23.2	17.9675	2.60888		0.227753	3.37139	17.9675	2.60888	0.187638	0.1452
He, 2016	XS	RX-4	Mn ore			0.0899023	1.23847	0.15	2.34	2.72	30.3	23.4662	1.90245		0.0899023	1.23847	23.4662	1.90245	0.0527768	0.081072
He, 2016	XS	RX-5	Mn ore			0.185798	2.92681	0.31	5.53	3.86	24.6	19.0518	2.6998		0.185798	2.92681	19.0518	2.6998	0.153624	0.141709
He, 2016	XS	RX-6	Mn ore			0.143844	2.25995	0.24	4.27	3.76	26.8	20.7556	2.62986		0.143844	2.25995	20.7556	2.62986	0.108884	0.126706
Zhang, 2014	XS	D-11	Mn ore			0.0899023	1.88417	0.15	3.56	1.71	31.31	24.2484	1.19603		0.0899023	1.88417	24.2484	1.19603	0.0777029	0.0493239
Zhang, 2014	XS	D-12	Mn ore			0.0659284	1.34962	0.11	2.55	1.62	28.6	22.1496	1.13308		0.0659284	1.34962	22.1496	1.13308	0.0609318	0.0511557
Zhang, 2014	XS	D-27	Mn ore			0.0659284	1.37608	0.11	2.6	2.39	26.6	20.6007	1.67164		0.0659284	1.37608	20.6007	1.67164	0.0667977	0.0811449
Wu et al., 2016	ML	ML-01-1	Mn ore	12.4	5.61	0.293681	6.19236	0.49	11.7	—	—	12.4	5.61		0.293681	6.19236	12.4	5.61	0.499384	0.452419
Wu et al., 2016	ML	ML-03-3	Mn ore	21.9	2.37	0.179805	2.73628	0.3	5.17	—	—	21.9	2.37		0.179805	2.73628	21.9	2.37	0.124944	0.108219
Wu et al., 2016	ML	ML-03-6	Mn ore	27.6	1.74	0.107883	1.27552	0.18	2.41	—	—	27.6	1.74		0.107883	1.27552	27.6	1.74	0.0462145	0.0630435
Wu et al., 2016	ML	ML-03-10	Mn ore	23.2	1.79	0.191792	2.66218	0.32	5.03	—	—	23.2	1.79		0.191792	2.66218	23.2	1.79	0.114749	0.0771552
Wu et al., 2016	ML	ML-05	Mn ore	30.3	1.15	0.0719219	0.926207	0.12	1.75	—	—	30.3	1.15		0.0719219	0.926207	30.3	1.15	0.0305679	0.0379538
He, 2016	ML	ML-2	Mn ore			0.107883	1.32315	0.18	2.5	2.57	31.8	24.6279	1.79754		0.107883	1.32315	24.6279	1.79754	0.0537258	0.0729879
He, 2016	ML	ML-3	Mn ore			0.0899023	1.09028	0.15	2.06	2.32	32.8	25.4023	1.62268		0.0899023	1.09028	25.4023	1.62268	0.0429204	0.0638791
He, 2016	ML	ML-4	Mn ore			0.0899023	1.16967	0.15	2.21	2.27	32.1	24.8602	1.58771		0.0899023	1.16967	24.8602	1.58771	0.0470497	0.0638654
He, 2016	ML	ML-5	Mn ore			0.0958958	1.56132	0.16	2.95	3.15	34.5	26.7189	2.20321		0.0958958	1.56132	26.7189	2.20321	0.058435	0.0824586
Zhu et a., 2013	DT	ZK105-7	Mn ore			0.113876	3.509	0.19	6.63	2.5	23.3	18.045	1.74858		0.113876	3.509	18.045	1.74858	0.194459	0.0969011
Zhu et a., 2013	DT	ZK105-12	Mn ore			0.0719219	1.10086	0.12	2.08	2.19	26.4	20.4458	1.53175		0.0719219	1.10086	20.4458	1.53175	0.053843	0.0749178
Zhu et a., 2013	DT	ZK105-13	Mn ore			0.0479479	0.613943	0.08	1.16	1.8	36.7	28.4227	1.25898		0.0479479	0.613943	28.4227	1.25898	0.0216004	0.0442946
Zhu et a., 2013	DT	ZK105-15	Mn ore			0.0899023	1.10086	0.15	2.08	2.27	32.3	25.0151	1.58771		0.0899023	1.10086	25.0151	1.58771	0.0440079	0.0634699
Zhu et a., 2013	DT	ZK105-16	Mn ore			0.101889	0.973841	0.17	1.84	1.92	36.2	28.0355	1.34291		0.101889	0.973841	28.0355	1.34291	0.034736	0.0479002
An et al.，2014	DT	ZK105-14	Mn ore			0.149837	2.70452	0.25	5.11	3.25	27.9	21.6075	2.27315		0.149837	2.70452	21.6075	2.27315	0.125166	0.105202
An et al.，2014	DT	ZK105-17	Mn ore			0.167818	2.03766	0.28	3.85	5.97	30.8	23.8534	4.1756		0.167818	2.03766	23.8534	4.1756	0.085424	0.175052
An et al.，2014	DT	ZK105-19	Mn ore			0.191792	2.6516	0.32	5.01	3.65	27.8	21.53	2.55292		0.191792	2.6516	21.53	2.55292	0.123158	0.118575
An et al.，2014	DT	ZK105-20	Mn ore			0.251727	3.1544	0.42	5.96	5.32	26.1	20.2135	3.72097		0.251727	3.1544	20.2135	3.72097	0.156054	0.184084
He et al., 2013a,b	XXB	H6	Mn ore			0.0779154	0.751551	0.13	1.42	2.75	27.83	21.5533	1.92343		0.0779154	0.751551	21.5533	1.92343	0.0348695	0.089241
He et al., 2013a,b	XXB	H7	Mn ore			0.0719219	0.751551	0.12	1.42	2.61	32.71	25.3326	1.82551		0.0719219	0.751551	25.3326	1.82551	0.0296673	0.0720617
He et al., 2013a,b	XXB	H18	Mn ore			0.0479479	0.529261	0.08	1	2.46	32.62	25.2629	1.7206		0.0479479	0.529261	25.2629	1.7206	0.0209501	0.0681076
Zhang, 2014	XXB	X-1	Mn ore			0.0958958	0.889159	0.16	1.68	3.66	34.19	26.4789	2.55992		0.0958958	0.889159	26.4789	2.55992	0.03358	0.0966778
Zhang, 2014	XXB	X-3	Mn ore			0.0899023	0.852111	0.15	1.61	2.61	33.63	26.0452	1.82551		0.0899023	0.852111	26.0452	1.82551	0.0327167	0.0700904
Zhang, 2014	XXB	X-4	Mn ore			0.0659284	0.650991	0.11	1.23	2.55	32.29	25.0074	1.78355		0.0659284	0.650991	25.0074	1.78355	0.026032	0.0713209
Zhang, 2014	XXB	X-5	Mn ore			0.0899023	1.10086	0.15	2.08	2.9	30.09	23.3036	2.02835		0.0899023	1.10086	23.3036	2.02835	0.0472401	0.0870403
Zhang, 2014	XXB	X-13	Mn ore			0.179805	3.22849	0.3	6.1	2.23	20.49	15.8687	1.55973		0.179805	3.22849	15.8687	1.55973	0.20345	0.0982896
Zhang, 2014	XXB	X-19	Mn ore			0.305668	7.3091	0.51	13.81	6.61	16.59	12.8483	4.62324		0.305668	7.3091	12.8483	4.62324	0.568876	0.359832
Zhang, 2014	XXB	X-48	Mn ore			0.149837	3.3661	0.25	6.36	2.4	23.69	18.347	1.67863		0.149837	3.3661	18.347	1.67863	0.183469	0.0914936
Zhang, 2014	XXB	X-53	Mn ore			0.11987	4.04356	0.2	7.64	3.42	26.06	20.1825	2.39205		0.11987	4.04356	20.1825	2.39205	0.20035	0.118521
Yang, 2013	BSX	st7	Mn ore			0.0599349	0.857403	0.1	1.62	3.78	26	20.136	2.64385		0.0599349	0.857403	20.136	2.64385	0.0425806	0.1313
Yang, 2013	BSX	st8	Mn ore			0.0719219	1.13262	0.12	2.14	3.47	26.2	20.2909	2.42702		0.0719219	1.13262	20.2909	2.42702	0.0558191	0.119611
Yang, 2013	BSX	st9	Mn ore			0.131857	2.32875	0.22	4.4	3.57	22.7	17.5803	2.49697		0.131857	2.32875	17.5803	2.49697	0.132464	0.142032
Zhang, 2014	CXP	C7-1	Mn ore			0.125863	3.35552	0.21	6.34	2.8	20.86	16.1553	1.95841		0.125863	3.35552	16.1553	1.95841	0.207704	0.121224

## Sheet: Trace element(Mn ores)
			PAAS	La	Ce	Pr	Nd	Sm	Eu	Gd	Tb	Dy	Ho	Er	Tm	Yb	Lu	Y		PAAS标准化
				38.2	79.6	8.83	33.9	5.55	1.08	4.66	0.774	4.68	0.991	2.85	0.405	2.82	0.433	27
Reference	Mn deposit	Rock type	Sample No.	La	Ce	Pr	Nd	Sm	Eu	Gd	Tb	Dy	Ho	Er	Tm	Yb	Lu	Y				La	Ce	Pr	Nd	Sm	Eu	Gd	Tb	Dy	Ho	Er	Tm	Yb	Lu	Y	Ce/Ce*	Eu/Eu*
Wu et al., 2016	YLZ	Mn ore	YLZ-03-1	18.4	52.4	4.56	18.6	3.93	1.46	4.27	0.69	4.19	0.84	2.37	0.32	1.71	0.22	22.5			YLZ-03-1	0.481675	0.658291	0.516421	0.548673	0.708108	1.35185	0.916309	0.891473	0.895299	0.847629	0.831579	0.790123	0.606383	0.508083	0.833333	1.31909	1.66441
Wu et al., 2016	YLZ	Mn ore	YLZ-09	27	76.2	6.67	28.4	5.82	1.18	6.01	1	5.81	1.18	3.46	0.49	2.91	0.41	31.1			YLZ-09	0.706806	0.957286	0.755379	0.837758	1.04865	1.09259	1.2897	1.29199	1.24145	1.19072	1.21404	1.20988	1.03191	0.946882	1.15185	1.30939	0.934499
Wu et al., 2016	YLZ	Mn ore	YLZ-01-4	29.5	80.4	6.71	26.7	5.26	1.51	5.8	0.86	5.03	1.03	2.99	0.41	2.38	0.3	28.8			YLZ-01-4	0.772251	1.01005	0.759909	0.787611	0.947748	1.39815	1.24464	1.11111	1.07479	1.03935	1.04912	1.01235	0.843972	0.692841	1.06667	1.31847	1.27546
He, 2016	YLZ	Mn ore	YLZ-1	23.3	72.1	7.34	34.8	8.15	1.56	7.31	1.23	6.63	1.29	3.09	0.41	2.27	0.29	33.3			YLZ-1	0.609948	0.905779	0.831257	1.02655	1.46847	1.44444	1.56867	1.58915	1.41667	1.30172	1.08421	1.01235	0.804965	0.669746	1.23333	1.25697	0.951188
He, 2016	YLZ	Mn ore	YLZ-2	39.6	96.4	8.91	35	6.41	1.15	4.93	1.01	5.79	1.15	3.57	0.55	3.11	0.4	31.1			YLZ-2	1.03665	1.21106	1.00906	1.03245	1.15495	1.06481	1.05794	1.30491	1.23718	1.16044	1.25263	1.35802	1.10284	0.923788	1.15185	1.184	0.962373
He, 2016	YLZ	Mn ore	YLZ-3	82	212	19.9	76.6	14.8	2.75	13.1	2.38	12.8	2.34	6.99	0.92	5.21	0.69	63.2			YLZ-3	2.1466	2.66332	2.25368	2.25959	2.66667	2.5463	2.81116	3.07494	2.73504	2.36125	2.45263	2.2716	1.84752	1.59353	2.34074	1.21052	0.929674
He, 2016	YLZ	Mn ore	YLZ-4	52.9	135	13.5	56.3	11.3	2.19	9.53	1.66	9.44	1.88	5.65	0.83	4.55	0.61	54.1			YLZ-4	1.38482	1.69598	1.52888	1.66077	2.03604	2.02778	2.04506	2.1447	2.01709	1.89707	1.98246	2.04938	1.61348	1.40878	2.0037	1.16414	0.993741
He, 2016	YLZ	Mn ore	YLZ-5	45.4	116	11.7	51.7	11.6	1.8	10	1.88	10.4	2.19	6.22	0.98	5.62	0.75	59			YLZ-5	1.18848	1.45729	1.32503	1.52507	2.09009	1.66667	2.14592	2.42894	2.22222	2.20989	2.18246	2.41975	1.99291	1.7321	2.18519	1.15956	0.786904
Zhang et al., 2014	YLZ	Mn ore	Y-7	27.8	75.9	8	37.5	8.9	1.5	8.9	1.3	7.9	1.7	4.3	0.6	3.7	0.5	46.3			Y-7	0.727749	0.953518	0.906002	1.10619	1.6036	1.38889	1.90987	1.67959	1.68803	1.71544	1.50877	1.48148	1.31206	1.15473	1.71481	1.16727	0.790607
Zhang et al., 2014	YLZ	Mn ore	Y-19	27	71	7.2	32.7	7.6	1.3	7.2	1	6.3	1.3	3.4	0.5	2.9	0.4	33.7			Y-19	0.706806	0.89196	0.815402	0.964602	1.36937	1.2037	1.54506	1.29199	1.34615	1.31181	1.19298	1.23457	1.02837	0.923788	1.24815	1.17193	0.826029
Wu et al., 2016	DW	Mn ore	DW-02-1	44.6	108	10.7	44.5	9.43	1.87	9.37	1.42	8.07	1.46	4.18	0.57	3.56	0.49	40.3			DW-02-1	1.16754	1.35678	1.21178	1.31268	1.6991	1.73148	2.01073	1.83463	1.72436	1.47326	1.46667	1.40741	1.26241	1.13164	1.49259	1.14048	0.933456
Wu et al., 2016	DW	Mn ore	DW-02-3	39	104	9.88	42	8.36	2.39	9.1	1.29	7.61	1.54	4.24	0.61	3.41	0.46	41.3			DW-02-3	1.02094	1.30653	1.11891	1.23894	1.50631	2.21296	1.95279	1.66667	1.62607	1.55399	1.48772	1.50617	1.20922	1.06236	1.52963	1.22114	1.2795
Wu et al., 2016	DW	Mn ore	DW-02-4	40.6	103	10.3	43.2	9.19	2.4	9.42	1.41	8.2	1.62	4.79	0.66	3.87	0.55	46.3			DW-02-4	1.06283	1.29397	1.16648	1.27434	1.65586	2.22222	2.02146	1.82171	1.75214	1.63471	1.6807	1.62963	1.37234	1.27021	1.71481	1.16087	1.20861
Wu et al., 2016	DW	Mn ore	DW-02-5	39.1	99.3	9.18	36.9	7.3	1.98	8.01	1.21	7.24	1.5	4.32	0.63	3.55	0.48	41.4			DW-02-5	1.02356	1.24749	1.03964	1.0885	1.31532	1.83333	1.71888	1.56331	1.54701	1.51362	1.51579	1.55556	1.25887	1.10855	1.53333	1.20928	1.20845
Wu et al., 2016	DW	Mn ore	DW-02-6	24.9	70	6.03	24.5	5.12	1.26	5.53	0.91	5.43	1.07	3.13	0.42	2.4	0.32	30.1			DW-02-6	0.651832	0.879397	0.682899	0.722714	0.922523	1.16667	1.1867	1.17571	1.16026	1.07972	1.09825	1.03704	0.851064	0.73903	1.11481	1.31771	1.10626
Wu et al., 2016	DW	Mn ore	DW-02-7	38.5	98.4	9.13	36.7	7.68	2.07	8.28	1.24	7.07	1.41	4.25	0.6	3.54	0.49	39.9			DW-02-7	1.00785	1.23618	1.03398	1.0826	1.38378	1.91667	1.77682	1.60207	1.51068	1.42281	1.49123	1.48148	1.25532	1.13164	1.47778	1.21086	1.21285
Wu et al., 2016	DW	Mn ore	DW-03-d2	24.9	68.7	6.17	25.8	5.68	1.82	6.67	1	6.1	1.2	3.42	0.46	2.6	0.37	34.3			DW-03-d2	0.651832	0.863065	0.698754	0.761062	1.02342	1.68519	1.43133	1.29199	1.30342	1.2109	1.2	1.1358	0.921986	0.854503	1.27037	1.27806	1.373
Wu et al., 2016	DW	Mn ore	DW-03-01	26.1	70.5	6.64	27.4	6.32	1.43	7.33	1.2	6.98	1.28	3.48	0.48	2.84	0.38	33.9			DW-03-01	0.683246	0.885678	0.751982	0.80826	1.13874	1.32407	1.57296	1.55039	1.49145	1.29162	1.22105	1.18519	1.00709	0.877598	1.25556	1.2342	0.976564
Wu et al., 2016	DW	Mn ore	DW-03-02	31.6	86	7.88	32.4	7.13	1.71	8.37	1.28	7.7	1.49	4.11	0.56	3.26	0.45	39.5			DW-03-02	0.827225	1.0804	0.892412	0.955752	1.28468	1.58333	1.79614	1.65375	1.6453	1.50353	1.44211	1.38272	1.15603	1.03926	1.46296	1.25655	1.02786
Wu et al., 2016	DW	Mn ore	DW-03-03	36.3	94.8	8.92	36.5	7.34	1.75	7.65	1.18	6.9	1.41	3.97	0.57	3.3	0.44	37.6			DW-03-03	0.950262	1.19095	1.01019	1.0767	1.32252	1.62037	1.64163	1.52455	1.47436	1.42281	1.39298	1.40741	1.17021	1.01617	1.39259	1.21498	1.09331
Wu et al., 2016	DW	Mn ore	DW-03-04	44.9	116	11.2	45.7	9.11	2.29	9.23	1.4	7.75	1.58	4.5	0.65	3.86	0.5	43.2			DW-03-04	1.17539	1.45729	1.2684	1.34808	1.64144	2.12037	1.98069	1.80879	1.65598	1.59435	1.57895	1.60494	1.36879	1.15473	1.6	1.19264	1.17079
Wu et al., 2016	DW	Mn ore	DW-03-05	37.5	98	9.38	38.6	8.01	1.94	8.68	1.34	8.14	1.67	4.81	0.69	4.02	0.55	45.8			DW-03-05	0.981675	1.23116	1.06229	1.13864	1.44324	1.7963	1.86266	1.73127	1.73932	1.68517	1.68772	1.7037	1.42553	1.27021	1.6963	1.20468	1.08672
Wu et al., 2016	DW	Mn ore	DW-03-07	26.6	74.6	6.39	25.9	5.39	1.25	5.66	0.88	5.26	1.1	2.97	0.42	2.27	0.29	28			DW-03-07	0.696335	0.937186	0.723669	0.764012	0.971171	1.15741	1.21459	1.13695	1.12393	1.10999	1.04211	1.03704	0.804965	0.669746	1.03704	1.31998	1.05904
Wu et al., 2016	DW	Mn ore	DW-03-08	20.3	56.2	4.94	19.8	4.09	1.1	4.48	0.71	4.34	0.94	2.7	0.35	2.07	0.28	25.7			DW-03-08	0.531414	0.70603	0.559456	0.584071	0.736937	1.01852	0.961373	0.917313	0.92735	0.948537	0.947368	0.864198	0.734043	0.646651	0.951852	1.29443	1.19945
Wu et al., 2016	DW	Mn ore	DW-03-09	22.3	61.3	5.49	22	4.5	1.46	5.24	0.79	4.77	0.95	2.92	0.4	2.18	0.3	28.2			DW-03-09	0.58377	0.770101	0.621744	0.648968	0.810811	1.35185	1.12446	1.02067	1.01923	0.958628	1.02456	0.987654	0.77305	0.692841	1.04444	1.27763	1.39706
Wu et al., 2016	DW	Mn ore	DW-03-10	27.5	77.8	7.22	29.5	5.94	2	6.51	1.04	6.07	1.26	3.56	0.48	2.97	0.4	37.3			DW-03-10	0.719895	0.977387	0.817667	0.870206	1.07027	1.85185	1.397	1.34367	1.29701	1.27144	1.24912	1.18519	1.05319	0.923788	1.38148	1.27135	1.50114
Wu et al., 2016	DW	Mn ore	DW-03-11	23.7	68	6.06	26.2	5.25	1.77	5.83	0.92	5.62	1.2	3.27	0.47	2.69	0.36	33.1			DW-03-11	0.620419	0.854271	0.686297	0.772861	0.945946	1.63889	1.25107	1.18863	1.20085	1.2109	1.14737	1.16049	0.953901	0.831409	1.22593	1.30751	1.49192
Wu et al., 2016	DTP	Mn ore	DTP-03	19.4	55.5	4.93	20.9	4.44	1.33	4.87	0.81	5.01	0.98	2.84	0.39	2.34	0.33	25.1			DTP-03	0.507853	0.697236	0.558324	0.616519	0.8	1.23148	1.04506	1.04651	1.07051	0.9889	0.996491	0.962963	0.829787	0.762125	0.92963	1.30792	1.33489
Wu et al., 2016	DTP	Mn ore	DTP-04	21.8	59.4	5.62	22.9	5.03	1.35	5.62	0.92	5.6	1.17	3.36	0.47	2.76	0.39	28.4			DTP-04	0.570681	0.746231	0.636467	0.675516	0.906306	1.25	1.20601	1.18863	1.19658	1.18063	1.17895	1.16049	0.978723	0.900693	1.05185	1.23635	1.18354
Wu et al., 2016	DTP	Mn ore	DTP-11	51.7	126	10.6	40.2	8.36	2.01	7.75	1.06	5.67	1.08	2.98	0.42	2.71	0.39	26.5			DTP-11	1.3534	1.58291	1.20045	1.18584	1.50631	1.86111	1.66309	1.36951	1.21154	1.08981	1.04561	1.03704	0.960993	0.900693	0.981481	1.23963	1.17443
Wu et al., 2016	DTP	Mn ore	DTP-18	36.1	87.1	8.24	31.1	5.79	1.56	5.71	0.86	5.05	1.06	3.17	0.48	3.07	0.41	29			DTP-18	0.945026	1.09422	0.933182	0.917404	1.04324	1.44444	1.22532	1.11111	1.07906	1.06963	1.11228	1.18519	1.08865	0.946882	1.07407	1.16518	1.27344
Wu et al., 2016	RX	Mn ore	RX-02-1	37	92	9.26	36.9	7.74	1.89	7.63	1.15	6.85	1.34	3.88	0.53	3.14	0.45	35.7			RX-02-1	0.968586	1.15578	1.0487	1.0885	1.39459	1.75	1.63734	1.48579	1.46368	1.35217	1.3614	1.30864	1.11348	1.03926	1.32222	1.14588	1.15438
Wu et al., 2016	RX	Mn ore	RX-02-2	33.8	76.2	6.9	27.6	5.43	1.28	5.01	0.85	4.89	0.97	2.86	0.41	2.49	0.36	28.7			RX-02-2	0.884817	0.957286	0.781427	0.814159	0.978378	1.18519	1.07511	1.09819	1.04487	0.978809	1.00351	1.01235	0.882979	0.831409	1.06296	1.14904	1.15432
Wu et al., 2016	RX	Mn ore	RX-02-3	26.3	71.2	6.48	25.9	5.36	1.54	5.58	0.89	5.35	1.01	2.97	0.4	2.36	0.33	28.9			RX-02-3	0.688482	0.894472	0.733862	0.764012	0.965766	1.42593	1.19742	1.14987	1.14316	1.01917	1.04211	0.987654	0.836879	0.762125	1.07037	1.25774	1.31835
Wu et al., 2016	RX	Mn ore	RX-02-5	21.4	62.7	5.45	22.6	4.46	1.37	4.4	0.71	4.28	0.82	2.54	0.36	2.02	0.28	22.9			RX-02-5	0.560209	0.787688	0.617214	0.666667	0.803604	1.26852	0.944206	0.917313	0.91453	0.827447	0.891228	0.888889	0.716312	0.646651	0.848148	1.33799	1.45155
Wu et al., 2016	RX	Mn ore	RX-02-6	19.3	55.5	4.85	19.6	4.07	1.27	4.49	0.67	4.18	0.82	2.41	0.34	1.95	0.26	21.3			RX-02-6	0.505236	0.697236	0.549264	0.578171	0.733333	1.17593	0.963519	0.865633	0.893162	0.827447	0.845614	0.839506	0.691489	0.600462	0.788889	1.3224	1.38601
Wu et al., 2016	RX	Mn ore	RX-02-7	19	53	4.69	19.7	4.09	1.35	4.2	0.67	3.7	0.79	2.07	0.3	1.72	0.24	19.7			RX-02-7	0.497382	0.665829	0.531144	0.581121	0.736937	1.25	0.901288	0.865633	0.790598	0.797175	0.726316	0.740741	0.609929	0.554273	0.72963	1.29472	1.52604
Wu et al., 2016	RX	Mn ore	RX-02-8	26.3	70.1	6.8	28.3	6.28	1.65	6.74	1.06	5.84	1.13	3.11	0.46	2.75	0.39	30.1			RX-02-8	0.688482	0.880653	0.770102	0.834808	1.13153	1.52778	1.44635	1.36951	1.24786	1.14026	1.09123	1.1358	0.975177	0.900693	1.11481	1.20755	1.1853
Wu et al., 2016	RX	Mn ore	RX-02-9	23.6	67.1	6	24.5	5.05	1.54	5.22	0.79	4.51	0.89	2.68	0.36	2.16	0.28	24.4			RX-02-9	0.617801	0.842965	0.679502	0.722714	0.90991	1.42593	1.12017	1.02067	0.963675	0.898083	0.940351	0.888889	0.765957	0.646651	0.903704	1.29957	1.4048
Wu et al., 2016	RX	Mn ore	RX-02-10	22.4	64.3	5.58	22.9	4.6	1.54	4.98	0.72	4.5	0.85	2.44	0.36	2.09	0.27	23.3			RX-02-10	0.586387	0.807789	0.631937	0.675516	0.828829	1.42593	1.06867	0.930233	0.961538	0.857719	0.85614	0.888889	0.741135	0.623557	0.862963	1.32607	1.50295
Wu et al., 2016	RX	Mn ore	RX-03-1	20.2	53.5	5	21.6	4.81	1.24	5.36	0.83	4.38	0.89	2.56	0.35	2.17	0.3	23.7			RX-03-1	0.528796	0.672111	0.566251	0.637168	0.866667	1.14815	1.15021	1.07235	0.935897	0.898083	0.898246	0.864198	0.769504	0.692841	0.877778	1.22755	1.13854
Wu et al., 2016	RX	Mn ore	RX-03-2	22.4	60.8	6.12	26.7	6.32	1.65	6.78	0.99	5.71	1.06	3.01	0.4	2.32	0.35	27.9			RX-03-2	0.586387	0.763819	0.693092	0.787611	1.13874	1.52778	1.45494	1.27907	1.22009	1.06963	1.05614	0.987654	0.822695	0.808314	1.03333	1.19395	1.17808
Wu et al., 2016	RX	Mn ore	RX-03-3	30.6	80.4	8.12	33.6	7.03	1.46	6.53	0.9	4.88	0.89	2.74	0.37	2.21	0.33	24			RX-03-3	0.801047	1.01005	0.919592	0.99115	1.26667	1.35185	1.40129	1.16279	1.04274	0.898083	0.961404	0.91358	0.783688	0.762125	0.888889	1.17404	1.0134
He, 2016	RX	Mn ore	RX-1	26.6	72.9	6.89	30.8	6.57	1.49	6.03	1.08	6.02	1.18	3.51	0.51	3.03	0.42	30.2			RX-1	0.696335	0.915829	0.780294	0.908555	1.18378	1.37963	1.29399	1.39535	1.28632	1.19072	1.23158	1.25926	1.07447	0.969977	1.11852	1.24043	1.1136
He, 2016	RX	Mn ore	RX-3	34.7	93.1	9.06	40.5	8.49	2.2	8.31	1.47	8.38	1.63	4.56	0.62	3.49	0.52	40.6			RX-3	0.908377	1.1696	1.02605	1.19469	1.52973	2.03704	1.78326	1.89922	1.7906	1.6448	1.6	1.53086	1.23759	1.20092	1.5037	1.20925	1.22973
He, 2016	RX	Mn ore	RX-4	33.6	89.2	9.2	39.9	9.44	2.64	9.01	1.55	8.98	1.71	4.69	0.67	3.69	0.51	47.2			RX-4	0.879581	1.1206	1.0419	1.17699	1.7009	2.44444	1.93348	2.00258	1.9188	1.72553	1.64561	1.65432	1.30851	1.17783	1.74815	1.16639	1.34518
He, 2016	RX	Mn ore	RX-5	27.4	78.7	7.64	35	8.46	2.1	7.89	1.39	7.96	1.56	4.2	0.53	3.43	0.52	38.2			RX-5	0.717277	0.988693	0.865232	1.03245	1.52432	1.94444	1.69313	1.79587	1.70085	1.57417	1.47368	1.30864	1.21631	1.20092	1.41481	1.24953	1.20868
He, 2016	RX	Mn ore	RX-6	44.4	123	11.5	47.5	9.18	2.17	7.91	1.22	6.87	1.21	3.49	0.44	2.74	0.38	31			RX-6	1.1623	1.54523	1.30238	1.40118	1.65405	2.00926	1.69742	1.57623	1.46795	1.22099	1.22456	1.08642	0.971631	0.877598	1.14815	1.25389	1.19903
Zhang et al., 2014	RX	Mn ore	D-11	30	71.8	7.2	31.8	6.5	1.2	6.5	1	6.7	1.6	4.4	0.6	4.3	0.5	46.8			D-11	0.78534	0.90201	0.815402	0.938053	1.17117	1.11111	1.39485	1.29199	1.43162	1.61453	1.54386	1.48148	1.52482	1.15473	1.73333	1.12699	0.866019
Zhang et al., 2014	RX	Mn ore	D-12	20.8	48.2	5.5	25.6	5.6	1.2	5.7	0.9	5.9	1.4	3.8	0.5	3.6	0.4	39.7			D-12	0.544503	0.605528	0.622877	0.755162	1.00901	1.11111	1.22318	1.16279	1.26068	1.41271	1.33333	1.23457	1.2766	0.923788	1.47037	1.03741	0.995537
Zhang et al., 2014	RX	Mn ore	D-27	16.4	40.8	4.7	21.7	5.6	1.1	5.5	0.9	5.8	1.4	3.7	0.5	3.3	0.4	41.3			D-27	0.429319	0.512563	0.532276	0.640118	1.00901	1.01852	1.18026	1.16279	1.23932	1.41271	1.29825	1.23457	1.17021	0.923788	1.52963	1.06607	0.930466
Wu et al., 2016	ML	Mn ore	ML-01-1	48.9	118	12.5	50.1	10.2	1.97	10.3	1.57	9	1.87	5.23	0.81	4.87	0.7	50.8			ML-01-1	1.2801	1.48241	1.41563	1.47788	1.83784	1.82407	2.2103	2.02842	1.92308	1.88698	1.83509	2	1.72695	1.61663	1.88148	1.09982	0.901192
Wu et al., 2016	ML	Mn ore	ML-03-3	42.2	115	10.3	41.4	8.99	2.03	9.1	1.28	7.58	1.47	4.15	0.61	3.53	0.51	38.2			ML-03-3	1.10471	1.44472	1.16648	1.22124	1.61982	1.87963	1.95279	1.65375	1.61966	1.48335	1.45614	1.50617	1.25177	1.17783	1.41481	1.27222	1.05224
Wu et al., 2016	ML	Mn ore	ML-03-6	29.6	88.3	7.43	30.3	6.98	1.57	7.08	1.06	6.12	1.15	3.29	0.44	2.58	0.34	30			ML-03-6	0.774869	1.1093	0.84145	0.893805	1.25766	1.4537	1.51931	1.36951	1.30769	1.16044	1.15439	1.08642	0.914894	0.785219	1.11111	1.37262	1.04697
Wu et al., 2016	ML	Mn ore	ML-03-10	41	108	9.78	37.8	7.29	1.73	7.3	1.13	6.59	1.35	3.98	0.59	3.64	0.52	36.9			ML-03-10	1.0733	1.35678	1.10759	1.11504	1.31351	1.60185	1.56652	1.45995	1.40812	1.36226	1.39649	1.45679	1.29078	1.20092	1.36667	1.24425	1.11238
Wu et al., 2016	ML	Mn ore	ML-05	17.9	54.9	4.66	20.6	4.63	1.05	4.9	0.78	4.75	0.93	2.73	0.36	2.12	0.28	24.1			ML-05	0.468586	0.689698	0.527746	0.60767	0.834234	0.972222	1.0515	1.00775	1.01496	0.938446	0.957895	0.888889	0.751773	0.646651	0.892593	1.38447	1.03113
He, 2016	ML	Mn ore	ML-2	29	81.5	6.71	27.3	5.69	1.56	4.84	0.83	5.08	1.11	3.28	0.44	2.52	0.37	26.8			ML-2	0.759162	1.02387	0.759909	0.80531	1.02523	1.44444	1.03863	1.07235	1.08547	1.12008	1.15088	1.08642	0.893617	0.854503	0.992593	1.34802	1.39976
He, 2016	ML	Mn ore	ML-3	23.5	69.2	5.75	23.5	4.71	1.45	4.33	0.81	4.9	1	2.87	0.41	2.07	0.28	25.5			ML-3	0.615183	0.869347	0.651189	0.693215	0.848649	1.34259	0.929185	1.04651	1.04701	1.00908	1.00702	1.01235	0.734043	0.646651	0.944444	1.37297	1.51037
He, 2016	ML	Mn ore	ML-4	25.3	70.5	5.73	24.3	5.04	1.24	4.52	0.81	4.43	0.9	2.58	0.36	2.14	0.29	25			ML-4	0.662304	0.885678	0.648924	0.716814	0.908108	1.14815	0.969957	1.04651	0.946581	0.908174	0.905263	0.888889	0.758865	0.669746	0.925926	1.35091	1.22269
He, 2016	ML	Mn ore	ML-5	31.2	90.3	7.71	33.4	7.75	1.61	6.68	1.19	6.46	1.26	3.54	0.49	2.85	0.38	30.8			ML-5	0.816754	1.13442	0.87316	0.985251	1.3964	1.49074	1.43348	1.53747	1.38034	1.27144	1.24211	1.20988	1.01064	0.877598	1.14074	1.34258	1.05357
Zhu et al., 2013	DT	Mn ore	ZK105-7	43.6	106	10.1	38	8.84	1.84	8.69	1.44	7.45	1.45	3.84	0.59	3.58	0.55	37.4			ZK105-7	1.14136	1.33166	1.14383	1.12094	1.59279	1.7037	1.86481	1.86047	1.59188	1.46317	1.34737	1.45679	1.2695	1.27021	1.38519	1.16547	0.985483
Zhu et al., 2013	DT	Mn ore	ZK105-12	20.2	58.2	5.69	25	5.31	1.67	5.63	0.92	5.28	1.19	3.37	0.56	3.13	0.43	36.2			ZK105-12	0.528796	0.731156	0.644394	0.737463	0.956757	1.5463	1.20815	1.18863	1.12821	1.20081	1.18246	1.38272	1.10993	0.993072	1.34074	1.24644	1.42851
Zhu et al., 2013	DT	Mn ore	ZK105-13	18.2	49	4.36	18.1	4.05	0.92	4.31	0.75	4.3	0.91	2.44	0.4	2.12	0.29	23.3			ZK105-13	0.47644	0.615578	0.493771	0.533923	0.72973	0.851852	0.924893	0.968992	0.918803	0.918264	0.85614	0.987654	0.751773	0.669746	0.862963	1.26896	1.02966
Zhu et al., 2013	DT	Mn ore	ZK105-15	18.2	53.4	4.61	19.7	4	0.98	3.98	0.67	3.71	0.8	2.34	0.36	2.02	0.27	20.1			ZK105-15	0.47644	0.670854	0.522084	0.581121	0.720721	0.907407	0.854077	0.865633	0.792735	0.807265	0.821053	0.888889	0.716312	0.623557	0.744444	1.34369	1.15241
Zhu et al., 2013	DT	Mn ore	ZK105-16	21.6	59	5.09	21.1	4.39	1.24	4.49	0.76	4.29	0.88	2.51	0.41	2.28	0.31	22.5			ZK105-16	0.565445	0.741206	0.576444	0.622419	0.790991	1.14815	0.963519	0.981912	0.916667	0.887992	0.880702	1.01235	0.808511	0.715935	0.833333	1.29821	1.3088
An et al., 2014	DT	Mn ore	ZK105-14	38	88.2	9.16	39	7.88	1.85	7.66	1.19	6.77	1.45	4.04	0.64	3.68	0.52	40.9			ZK105-14	0.994764	1.10804	1.03737	1.15044	1.41982	1.71296	1.64378	1.53747	1.44658	1.46317	1.41754	1.58025	1.30496	1.20092	1.51481	1.09052	1.11827
An et al., 2014	DT	Mn ore	ZK105-17	38.6	96.9	9.06	36.7	9.24	1.84	9.6	1.71	9.23	1.85	4.99	0.79	4.54	0.67	47			ZK105-17	1.01047	1.21734	1.02605	1.0826	1.66486	1.7037	2.06009	2.2093	1.97222	1.8668	1.75088	1.95062	1.60993	1.54734	1.74074	1.19551	0.914752
An et al., 2014	DT	Mn ore	ZK105-19	41.3	101	9.18	36.8	6.94	1.77	6.58	1.04	5.89	1.17	3.36	0.54	3.04	0.42	30.6			ZK105-19	1.08115	1.26884	1.03964	1.08555	1.25045	1.63889	1.41202	1.34367	1.25855	1.18063	1.17895	1.33333	1.07801	0.969977	1.13333	1.19658	1.23111
An et al., 2014	DT	Mn ore	ZK105-20	41.8	103	9.57	38.8	7.53	1.95	7.46	1.18	6.6	1.35	3.91	0.65	3.59	0.53	34.7			ZK105-20	1.09424	1.29397	1.08381	1.14454	1.35676	1.80556	1.60086	1.52455	1.41026	1.36226	1.37193	1.60494	1.27305	1.22402	1.28519	1.18819	1.22095
Yu et al., 2016	XXB	Mn ore	ZK4207-24	50	120	13.2	56	13	3.4	13.1	2	11.9	2.3	6.2	0.9	5.2	0.7	65.3			ZK4207-24	1.3089	1.50754	1.4949	1.65192	2.34234	3.14815	2.81116	2.58398	2.54274	2.32089	2.17544	2.22222	1.84397	1.61663	2.41852	1.07535	1.22175
Yu et al., 2016	XXB	Mn ore	ZK4207-23	52	119.5	12.4	52.2	11.5	2.7	11	1.7	10.1	2	5.4	0.8	4.6	0.7	57.5			ZK4207-23	1.36126	1.50126	1.4043	1.53982	2.07207	2.5	2.36052	2.19638	2.15812	2.01816	1.89474	1.97531	1.63121	1.61663	2.12963	1.08568	1.12801
Yu et al., 2016	XXB	Mn ore	ZK4207-22	37.7	88.5	8.9	39.2	8.5	1.8	7.9	1.3	7.8	1.5	4.3	0.7	3.8	0.6	43.8			ZK4207-22	0.986911	1.11181	1.00793	1.15634	1.53153	1.66667	1.69528	1.67959	1.66667	1.51362	1.50877	1.7284	1.34752	1.38568	1.62222	1.11469	1.03301
Yu et al., 2016	XXB	Mn ore	ZK4207-20	55.7	137.5	12.8	52	10.2	1.8	8.5	1.4	8.6	1.8	4.9	0.8	4.5	0.6	50			ZK4207-20	1.45812	1.72739	1.4496	1.53392	1.83784	1.66667	1.82403	1.80879	1.83761	1.81635	1.7193	1.97531	1.59574	1.38568	1.85185	1.18814	0.910281
Yu et al., 2016	XXB	Mn ore	ZK4207-19	42.7	109	9.7	40.4	8.2	1.7	7.2	1.2	7.2	1.4	4.1	0.6	3.6	0.5	39.7			ZK4207-19	1.1178	1.36935	1.09853	1.19174	1.47748	1.57407	1.54506	1.55039	1.53846	1.41271	1.4386	1.48148	1.2766	1.15473	1.47037	1.23569	1.04156
Yu et al., 2016	XXB	Mn ore	ZK4207-18	35.5	89.8	8.1	34.4	7.7	1.7	7	1.1	6.5	1.3	3.7	0.5	3.2	0.5	36			ZK4207-18	0.929319	1.12814	0.917327	1.01475	1.38739	1.57407	1.50215	1.42119	1.38889	1.31181	1.29825	1.23457	1.13475	1.15473	1.33333	1.22183	1.0895
Yu et al., 2016	XXB	Mn ore	ZK4207-17	31.9	86.5	7.3	31	6.4	1.6	6	0.9	5.9	1.1	3.1	0.5	2.8	0.4	31.1			ZK4207-17	0.835079	1.08668	0.826727	0.914454	1.15315	1.48148	1.28755	1.16279	1.26068	1.10999	1.08772	1.23457	0.992908	0.923788	1.15185	1.30783	1.21398
Yu et al., 2016	XXB	Mn ore	ZK4207-16	31	78.6	7.2	31.4	7.2	1.8	6.3	0.9	6	1.2	3.4	0.5	3	0.4	33.1			ZK4207-16	0.811518	0.987437	0.815402	0.926254	1.2973	1.66667	1.35193	1.16279	1.28205	1.2109	1.19298	1.23457	1.06383	0.923788	1.22593	1.21387	1.25823
Yu et al., 2016	XXB	Mn ore	ZK4207-15	43.2	91.4	10.4	45.3	10.2	2.5	10	1.5	9.1	1.8	5.3	0.7	4.3	0.6	50.5			ZK4207-15	1.13089	1.14824	1.1778	1.33628	1.83784	2.31481	2.14592	1.93798	1.94444	1.81635	1.85965	1.7284	1.52482	1.38568	1.87037	0.994711	1.16213
Yu et al., 2016	XXB	Mn ore	ZK4207-14	46.6	105.5	11.4	49.8	11	2.7	10.9	1.7	9.8	2	5.5	0.8	4.7	0.7	55.8			ZK4207-14	1.2199	1.32538	1.29105	1.46903	1.98198	2.5	2.33906	2.19638	2.09402	2.01816	1.92982	1.97531	1.66667	1.61663	2.06667	1.05568	1.15713
Yu et al., 2016	XXB	Mn ore	ZK4207-13	57.7	137	14	60	14	2.6	12.1	1.8	11.2	2.1	5.7	0.9	5.2	0.7	61.3			ZK4207-13	1.51047	1.72111	1.5855	1.76991	2.52252	2.40741	2.59657	2.32558	2.39316	2.11907	2	2.22222	1.84397	1.61663	2.27037	1.11183	0.940561
Yu et al., 2016	XXB	Mn ore	ZK4207-12	53.2	121.5	12.8	54.8	11.9	2.5	10.9	1.7	10.1	1.9	5.1	0.8	4.8	0.7	55.8			ZK4207-12	1.39267	1.52638	1.4496	1.61652	2.14414	2.31481	2.33906	2.19638	2.15812	1.91726	1.78947	1.97531	1.70213	1.61663	2.06667	1.07406	1.03266
Yu et al., 2016	XXB	Mn ore	ZK4207-9	51.9	131	12.9	54.7	12.8	2.3	11.7	1.7	10.8	2	5.6	0.8	5	0.7	56.7			ZK4207-9	1.35864	1.64573	1.46093	1.61357	2.30631	2.12963	2.51073	2.19638	2.30769	2.01816	1.96491	1.97531	1.77305	1.61663	2.1	1.16736	0.884207
Yu et al., 2016	XXB	Mn ore	ZK4207-5	40.5	98.7	9.1	38.5	7.5	1.4	6.6	1.1	6.6	1.4	3.9	0.6	3.8	0.6	37.9			ZK4207-5	1.06021	1.23995	1.03058	1.13569	1.35135	1.2963	1.41631	1.42119	1.41026	1.41271	1.36842	1.48148	1.34752	1.38568	1.4037	1.18611	0.936745
Yu et al., 2016	XXB	Mn ore	ZK4207-4	30.5	78.4	7	30.2	7	1.6	6.1	0.9	5.7	1.1	3.3	0.5	2.8	0.4	31.2			ZK4207-4	0.798429	0.984925	0.792752	0.890855	1.26126	1.48148	1.30901	1.16279	1.21795	1.10999	1.15789	1.23457	0.992908	0.923788	1.15556	1.23798	1.15278
Yu et al., 2016	XXB	Mn ore	ZK4207-2	35.7	95.4	8.1	35.4	8.3	1.7	7.5	1	6.1	1.2	3.5	0.6	3.1	0.5	34.6			ZK4207-2	0.934555	1.19849	0.917327	1.04425	1.4955	1.57407	1.60944	1.29199	1.30342	1.2109	1.22807	1.48148	1.09929	1.15473	1.28148	1.29435	1.01392
He et al., 2013a,b	XXB	Mn ore	H6	27.788	76.327	7.146	29.839	8.059	1.75	7.49	1.228	6.838	1.51	3.881	0.538	3.258	0.472	35.895			H6	0.727435	0.958882	0.809287	0.880206	1.45207	1.62037	1.6073	1.58656	1.46111	1.52371	1.36175	1.3284	1.15532	1.09007	1.32944	1.24796	1.05928
He et al., 2013a,b	XXB	Mn ore	H7	21.448	64.269	5.586	22.744	4.959	1.721	5.1	0.884	5.114	1.142	2.912	0.392	2.14	0.257	27.858			H7	0.561466	0.807399	0.632616	0.670914	0.893514	1.59352	1.09442	1.14212	1.09274	1.15237	1.02175	0.967901	0.758865	0.593533	1.03178	1.35234	1.60319
He et al., 2013a,b	XXB	Mn ore	H8	25.219	69.036	6.037	24.501	5.504	1.711	5.45	0.891	5.122	1.155	2.942	0.402	2.02	0.327	28.903			H8	0.660183	0.867286	0.683692	0.722743	0.991712	1.58426	1.16953	1.15116	1.09444	1.16549	1.03228	0.992593	0.716312	0.755196	1.07048	1.29072	1.46607
He et al., 2013a,b	XXB	Mn ore	H18	18.69	50.76	4.55	17.772	4.229	0.924	4.138	0.751	4.501	1.018	2.601	0.381	2.031	0.291	27.099			H18	0.489267	0.637688	0.515289	0.524248	0.761982	0.855556	0.887983	0.970284	0.961752	1.02725	0.912632	0.940741	0.720213	0.672055	1.00367	1.26959	1.03706
Zhang et al., 2014	XXB	Mn ore	X-1	27.4	81.1	7.3	31	6.5	1.9	6.5	1.1	6.1	1.2	3.2	0.5	2.9	0.4	31.4			X-1	0.717277	1.01884	0.826727	0.914454	1.17117	1.75926	1.39485	1.42119	1.30342	1.2109	1.12281	1.23457	1.02837	0.923788	1.16296	1.31974	1.3712
Zhang et al., 2014	XXB	Mn ore	X-3	25.6	75.9	6.3	23.9	4.9	1.5	5	0.9	4.7	1	2.7	0.4	2.3	0.3	23.6			X-3	0.670157	0.953518	0.713477	0.705015	0.882883	1.38889	1.07296	1.16279	1.00427	1.00908	0.947368	0.987654	0.815603	0.692841	0.874074	1.37828	1.42024
Zhang et al., 2014	XXB	Mn ore	X-4	21	65.6	5.8	25.5	5.3	1.8	5.4	0.9	5	1	2.8	0.4	2.2	0.3	25.4			X-4	0.549738	0.824121	0.656852	0.752212	0.954955	1.66667	1.1588	1.16279	1.06838	1.00908	0.982456	0.987654	0.780142	0.692841	0.940741	1.36603	1.57697
Zhang et al., 2014	XXB	Mn ore	X-5	29.4	78.5	7.1	30.5	6.6	1.8	6.9	1.1	6.2	1.2	3.3	0.5	2.7	0.4	31.2			X-5	0.769634	0.986181	0.804077	0.899705	1.18919	1.66667	1.48069	1.42119	1.32479	1.2109	1.15789	1.23457	0.957447	0.923788	1.15556	1.25332	1.2485
Zhang et al., 2014	XXB	Mn ore	X-13	35.6	91.3	12	62.6	18.5	4.1	18.8	2.9	15	2.9	7.2	1	5.7	0.8	81.2			X-13	0.931937	1.14698	1.359	1.84661	3.33333	3.7963	4.03433	3.74677	3.20513	2.92634	2.52632	2.46914	2.02128	1.84758	3.00741	1.00132	1.03053
Zhang et al., 2014	XXB	Mn ore	X-19	90.9	191	21.4	88	15.4	2.4	13.9	2.1	13.4	3	8	1	6.8	0.9	76.2			X-19	2.37958	2.3995	2.42356	2.59587	2.77477	2.22222	2.98283	2.71318	2.86325	3.02725	2.80702	2.46914	2.41135	2.07852	2.82222	0.999138	0.771926
Zhang et al., 2014	XXB	Mn ore	X-48	54	130	15.7	73.6	19.6	3.5	20	2.9	17.3	3.6	9.1	1.1	7.6	0.9	94.1			X-48	1.41361	1.63317	1.77803	2.17109	3.53153	3.24074	4.29185	3.74677	3.69658	3.63269	3.19298	2.71605	2.69504	2.07852	3.48519	1.0234	0.828476
Zhang et al., 2014	XXB	Mn ore	X-53	55.4	124	14.4	63.8	15.2	3	15.3	2.3	13.8	2.9	7.4	0.9	6.4	0.8	74.5			X-53	1.45026	1.55779	1.6308	1.88201	2.73874	2.77778	3.28326	2.97158	2.94872	2.92634	2.59649	2.22222	2.2695	1.84758	2.75926	1.0112	0.922543
Yang, 2013	BSX	Mn ore	st7	23.8	62.8	5.49	21.3	4.7	2.1	4.61	0.8	4.85	1.02	2.86	0.4	2.31	0.32	30			st7	0.623037	0.788945	0.621744	0.628319	0.846847	1.94444	0.98927	1.03359	1.03632	1.02926	1.00351	0.987654	0.819149	0.73903	1.11111	1.2676	2.118
Yang, 2013	BSX	Mn ore	st8	34	85	7.48	29.6	7.41	2.54	8.53	1.7	9.08	1.76	5.05	0.72	4.21	0.58	53.5			st8	0.890052	1.06784	0.847112	0.873156	1.33514	2.35185	1.83047	2.19638	1.94017	1.77598	1.77193	1.77778	1.49291	1.33949	1.98148	1.2294	1.48588
Yang, 2013	BSX	Mn ore	st9	35.7	92.5	8.35	32.9	7.42	2.25	7.32	1.3	6.78	1.35	3.7	0.51	2.94	0.41	38.8			st9	0.934555	1.16206	0.94564	0.970501	1.33694	2.08333	1.57082	1.67959	1.44872	1.36226	1.29825	1.25926	1.04255	0.946882	1.43704	1.23611	1.43295
He et al., 2013a,b	YJW	Mn ore	1219	44.105	109	10.284	39.964	8.498	1.91	9.025	1.366	7.814	1.735	4.354	0.605	3.427	0.506	43.857			1219	1.15458	1.36935	1.16467	1.17888	1.53117	1.76852	1.9367	1.76486	1.66966	1.75076	1.52772	1.49383	1.21525	1.16859	1.62433	1.18085	1.01995
He et al., 2013a,b	YJW	Mn ore	1220	73.148	180	16.387	56.983	9.4	1.995	9.766	1.304	6.766	1.495	3.824	0.499	3.016	0.431	36.92			1220	1.91487	2.26131	1.85583	1.68091	1.69369	1.84722	2.09571	1.68475	1.44573	1.50858	1.34175	1.2321	1.0695	0.995381	1.36741	1.19941	0.974941
He et al., 2013a,b	YJW	Mn ore	1221	42.226	103	9.557	35.17	7.244	1.624	7.509	1.186	6.632	1.49	3.786	0.534	3.127	0.464	37.382			1221	1.10539	1.29397	1.08233	1.03746	1.30523	1.5037	1.61137	1.5323	1.41709	1.50353	1.32842	1.31852	1.10887	1.07159	1.38452	1.18294	1.03114
He et al., 2013a,b	YJW	Mn ore	1222	52.679	127	11.535	43.43	8.227	1.795	8.507	1.232	6.97	1.525	3.984	0.529	3.101	0.449	38.282			1222	1.37903	1.59548	1.30634	1.28112	1.48234	1.66204	1.82554	1.59173	1.48932	1.53885	1.39789	1.30617	1.09965	1.03695	1.41785	1.18827	1.0049
He et al., 2013a,b	YJW	Mn ore	1223	41.616	108	10.095	40.068	8.223	1.834	8.95	1.353	7.688	1.642	4.209	0.593	3.415	0.502	42.179			1223	1.08942	1.35678	1.14326	1.18195	1.48162	1.69815	1.9206	1.74806	1.64274	1.65691	1.47684	1.4642	1.21099	1.15935	1.56219	1.21538	0.998258
He et al., 2013a,b	YJW	Mn ore	1224	41.292	107	10.161	38.762	8.179	1.752	8.124	1.272	7.08	1.598	4.166	0.551	3.155	0.46	39.179			1224	1.08094	1.34422	1.15074	1.14342	1.47369	1.62222	1.74335	1.64341	1.51282	1.61251	1.46175	1.36049	1.11879	1.06236	1.45107	1.20467	1.00852
He et al., 2013a,b	YJW	Mn ore	1225	40.582	101	9.695	36.398	7.524	1.743	8.061	1.237	6.955	1.59	3.948	0.537	3.24	0.468	38.893			1225	1.06236	1.26884	1.09796	1.07369	1.35568	1.61389	1.72983	1.59819	1.48611	1.60444	1.38526	1.32593	1.14894	1.08083	1.44048	1.17468	1.04611
Zhang, 2014	CXP	Mn ore	C7-1	36.9	88.7	10.5	49.2	12.7	3.8	12.6	1.9	11.2	2.3	5.9	0.7	4.8	0.6	59.6			C7-1	0.965969	1.11432	1.18913	1.45133	2.28829	3.51852	2.70386	2.45478	2.39316	2.32089	2.07018	1.7284	1.70213	1.38568	2.20741	1.03413	1.40962
																																				Average	1.21835	1.16178

## Sheet: Trace element(black shale)
				La	Ce	Pr	Nd	Sm	Eu	Gd	Tb	Dy	Ho	Er	Tm	Yb	Lu	Y
References	Rock type	Mn deposit	Sample No.	38.2	79.6	8.83	33.9	5.55	1.08	4.66	0.774	4.68	0.991	2.85	0.405	2.82	0.433	27	PAAS	Mn deposit		La	Ce	Pr	Nd	Sm	Eu	Gd	Tb	Dy	Ho	Er	Tm	Yb	Lu	Y	Ce/Ce*	Eu/Eu*
Ma et al., 2019	Black shale	RX	H5	38.3	72.4	8.96	32	5.52	1.03	4.56	0.72	4.44	1.08	3.14	0.53	3.66	0.58	23.9		RX	H5	1.00262	1.0255	1.01472	0.943953	0.994595	0.953704	0.978541	0.930233	0.948718	1.08981	1.10175	1.30864	1.29787	1.33949	0.885185	1.01668	0.966689
	Black shale	RX	H6	33.6	61.5	7.67	27.8	5.88	1.14	4.77	0.83	5.19	1.18	3.57	0.6	4.06	0.65	28.9		RX	H6	0.879581	0.871105	0.86863	0.820059	1.05946	1.05556	1.02361	1.07235	1.10897	1.19072	1.25263	1.48148	1.43972	1.50115	1.07037	0.996567	1.01346
	Black shale	RX	H7	36.8	69.5	9.06	34.3	7.22	1.35	5.53	0.91	5.32	1.14	3.34	0.55	3.71	0.59	27.5		RX	H7	0.963351	0.984419	1.02605	1.0118	1.3009	1.25	1.1867	1.17571	1.13675	1.15035	1.17193	1.35802	1.3156	1.36259	1.01852	0.989665	1.00499
	Black shale	RX	H8	48	95.8	12.9	51.4	11.2	1.9	8.41	1.48	8.83	1.87	5.18	0.8	5	0.75	44.7		RX	H8	1.25654	1.35694	1.46093	1.51622	2.01802	1.75926	1.80472	1.91214	1.88675	1.88698	1.81754	1.97531	1.77305	1.7321	1.65556	0.998678	0.920418
	Black shale	RX	H9	34.7	65.5	8.11	29	5.29	0.97	4.36	0.7	4.13	0.92	2.84	0.47	3.21	0.51	22.5		RX	H9	0.908377	0.927762	0.91846	0.855457	0.953153	0.898148	0.935622	0.904393	0.882479	0.928355	0.996491	1.16049	1.1383	1.17783	0.833333	1.0157	0.951037
	Black shale	RX	H10	45.5	80.1	10.2	37	7.03	1.23	5.58	0.91	5.54	1.21	3.67	0.61	4.18	0.67	29.8		RX	H10	1.1911	1.13456	1.15515	1.09145	1.26667	1.13889	1.19742	1.17571	1.18376	1.22099	1.28772	1.50617	1.48227	1.54734	1.1037	0.967126	0.924388
	Black shale	RX	H11	42.9	77.4	9.94	37.2	7.58	1.34	5.9	0.97	5.75	1.28	3.79	0.62	4.22	0.66	31.5		RX	H11	1.12304	1.09632	1.12571	1.09735	1.36577	1.24074	1.26609	1.25323	1.22863	1.29162	1.32982	1.53086	1.49645	1.52425	1.16667	0.975048	0.942862
	Black shale	RX	H12	42	75.5	9.5	35.2	6.69	1.15	5.13	0.84	5.06	1.12	3.33	0.54	3.69	0.56	27.7		RX	H12	1.09948	1.06941	1.07588	1.03835	1.20541	1.06481	1.10086	1.08527	1.0812	1.13017	1.16842	1.33333	1.30851	1.2933	1.02593	0.983201	0.923411
Wu et al., 2016	Black shale	YLZ	YLZ-08-1	57.5	117	12.5	44.5	7.12	1.17	5.35	0.96	6.07	1.25	3.76	0.56	3.68	0.56	32.7		YLZ	YLZ-08-1	1.50524	1.65722	1.41563	1.31268	1.28288	1.08333	1.14807	1.24031	1.29701	1.26135	1.3193	1.38272	1.30496	1.2933	1.21111	1.13475	0.891283
	Black shale	YLZ	YLZ-08-2	32.2	62.5	7.04	25.7	4.64	0.79	4.15	0.67	4.08	0.9	2.7	0.41	2.74	0.42	22.8		YLZ	YLZ-08-2	0.842932	0.885269	0.797282	0.758112	0.836036	0.731481	0.890558	0.865633	0.871795	0.908174	0.947368	1.01235	0.971631	0.969977	0.844444	1.07946	0.847312
	Black shale	DW	DW-02-2	31.3	65.8	6.27	21.4	3.44	0.69	3.4	0.53	3.36	0.71	2.45	0.39	2.61	0.38	19.2		DW	DW-02-2	0.819372	0.932011	0.710079	0.631268	0.61982	0.638889	0.729614	0.684755	0.717949	0.716448	0.859649	0.962963	0.925532	0.877598	0.711111	1.21875	0.946899
	Black shale	RX	RX-02-4	34.6	64.5	7.44	27.3	4.77	0.81	4.54	0.74	4.49	0.97	2.8	0.43	2.84	0.44	23.7		RX	RX-02-4	0.905759	0.913598	0.842582	0.80531	0.859459	0.75	0.974249	0.956072	0.959402	0.978809	0.982456	1.06173	1.00709	1.01617	0.877778	1.0451	0.818014
	Black shale	GZ	GZ-3-1	40.5	87	10.1	39.7	6.47	1.18	6.08	1.21	6.77	1.46	4.04	0.58	3.62	0.59	39.6		GZ	GZ-3-1	1.06021	1.23229	1.14383	1.17109	1.16577	1.09259	1.30472	1.56331	1.44658	1.47326	1.41754	1.4321	1.28369	1.36259	1.46667	1.11822	0.884516
	Black shale	GZ	GZ-3-2	37.8	81.4	9.58	36.7	6.51	1.15	5.78	1.04	5.75	1.2	3.45	0.48	3.08	0.5	32.6		GZ	GZ-3-2	0.989529	1.15297	1.08494	1.0826	1.17297	1.06481	1.24034	1.34367	1.22863	1.2109	1.21053	1.18519	1.0922	1.15473	1.20741	1.11159	0.882449
	Black shale	GZ	GZ-21	42.7	93.3	9.75	36.2	4.97	0.99	5.11	1	6.09	1.28	3.88	0.62	3.99	0.64	36.5		GZ	GZ-21	1.1178	1.32153	1.10419	1.06785	0.895495	0.916667	1.09657	1.29199	1.30128	1.29162	1.3614	1.53086	1.41489	1.47806	1.35185	1.1895	0.920319
Xiao et al., 2017	Black shale	ML	ML-1	25.6	51.8	5.6	22	4.37	0.72	3.12	0.64	3.59	0.81	2.49	0.35	2.58	0.43	19.3		ML	ML-1	0.670157	0.733711	0.634202	0.648968	0.787387	0.666667	0.669528	0.826873	0.767094	0.817356	0.873684	0.864198	0.914894	0.993072	0.714815	1.12501	0.915176
	Black shale	ML	ML-6	32.5	76.5	8.71	35.5	6.24	1.08	4.4	0.77	3.83	0.82	2.24	0.43	2.59	0.4	20.7		ML	ML-6	0.850785	1.08357	0.98641	1.0472	1.12432	1	0.944206	0.994832	0.818376	0.827447	0.785965	1.06173	0.91844	0.923788	0.766667	1.17959	0.96687
	Black shale	RX	RX-2	26.9	51.6	5.16	20.1	3.89	0.69	3.8	0.61	3.76	0.87	2.76	0.46	3.43	0.54	21.3		RX	RX-2	0.704188	0.730878	0.584371	0.59292	0.700901	0.638889	0.815451	0.788114	0.803419	0.877901	0.968421	1.1358	1.21631	1.24711	0.788889	1.13441	0.842666
																																				Average	1.07106	0.920153

## Sheet: δ13Ccarb
Mn deposit	Rock type	Mn(wt.%)	δ13Ccarb (‰)
DT	Mn ore	18.0759	-7.05
DT	Mn ore	28.446	-8.99
DT	Mn ore	21.592	-8.38
DT	Mn ore	28.0045	-9.14
YLZ	Mn ore	25.05	-10.12
DW	Mn ore	24.7	-9.18
DW	Mn ore	18.6	-8.27
DW	Mn ore	22.6	-8.94
DW	Mn ore	23.6	-9.04
DW	Mn ore	22.2	-7.59
DW	Mn ore	17.1	-9.04
DW	Mn ore	17.9	-8.29
DW	Mn ore	27.2	-9.7
DW	Mn ore	24.2	-9.07
DW	Mn ore	25.1	-9.32
DW	Mn ore	24.4	-8.54
DW	Mn ore	23.6	-8.54
DW	Mn ore	15.2	-9.04
DW	Mn ore	17.1	-9.45
DW	Mn ore	16.7	-8.81
DW	Mn ore	16.8	-8.8
DW	Mn ore	25.7	-9.95
XXB	Mn ore	25.34	-9.28
RX	Mn ore	18	-6.61
RX	Mn ore	13.7	-6.52
RX	Mn ore	22.7	-6.33
RX	Mn ore	24.5	-8.41
RX	Mn ore	25.8	-8.63
RX	Mn ore	26.5	-9.14
RX	Mn ore	19.1	-7.64
RX	Mn ore	26.5	-8.56
RX	Mn ore	25.7	-7.82
ML	Mn ore	21.9	-8.33
ML	Mn ore	30.3	-9.11
DTP	Mn ore	30.65	-10.36
DTP	Mn ore	26.14	-10.38
DTP	Mn ore	18.1	-8.14
DTP	Mn ore	26.61	-8.25
DTP	Mn ore	26.72	-9.96

## Sheet: δ13Ccarb & δ18Ccarb
Mn deposit	Sample No.	Rock type	δ13Ccarb(‰)	δ18OV-PDB(‰)	Reference
GD	ZK2115-30	Mn ore	-7.2	-11.5	Qu, 2018
	ZK2115-29	Mn ore	-7.3	-10.7	Qu, 2018
	ZK2115-27	Mn ore	-9.9	-8.7	Qu, 2018
	ZK2115-26	Mn ore	-9.4	-8.4	Qu, 2018
	ZK2115-25	Mn ore	-8.9	-7.9	Qu, 2018
	ZK2115-24	Mn ore	-10.5	-8	Qu, 2018
	ZK2115-23	Mn ore	-9.8	-8.2	Qu, 2018
	ZK2115-22	Mn ore	-10.3	-7.2	Qu, 2018
	ZK2115-21	Mn ore	-10	-8	Qu, 2018
	ZK2115-20	Mn ore	-9.2	-6.4	Qu, 2018
	ZK2115-18	Mn ore	-10.7	-6.9	Qu, 2018
	ZK2115-17	Mn ore	-9.9	-9.6	Qu, 2018
	ZK2115-16	Mn ore	-11.2	-8	Qu, 2018
	ZK2115-15	Mn ore	-8.8	-14.3	Qu, 2018
	ZK2115-14	Mn ore	-8.4	-8.6	Qu, 2018
	ZK2115-13	Mn ore	-9.9	-3.9	Qu, 2018
	ZK2115-12	Mn ore	-6.8	-11.8	Qu, 2018
	ZK2115-11	Mn ore	-11.5	-4.6	Qu, 2018
	ZK2115-10	Mn ore	-11.3	-4.9	Qu, 2018
	ZK2115-9	Mn ore	-7.9	-15	Qu, 2018
	ZK2115-8	Mn ore	-8.7	-14.2	Qu, 2018
YLZ	ZH1	Mn ore	-10.12	-11.81	Zhou, 2007
	C-2	Mn ore	-8.02	-6.18	Zhou and Du, 2012
	C-3	Mn ore	-9.85	-6.96	Zhou and Du, 2012
	C-4	Mn ore	-8.016	-6.018	Tang and Liu, 1999
	C-5	Mn ore	-9.853	-6.958	Tang and Liu, 1999
	81175	Mn ore	-7.443	-2.648	Tang and Liu, 1999
	81197	Mn ore	-7.819	-6.779	Tang and Liu, 1999
	81198	Mn ore	-7.358	-2.429	Tang and Liu, 1999
DW	ZH4	Mn ore	-9.18	-11.3	Zhou, 2007
	DW-03-d2	Mn ore	-8.27	-12.34	Wu et al., 2016
	DW-03-1	Mn ore	-8.94	-7.7	Wu et al., 2016
	DW-03-2	Mn ore	-9.04	-7.88	Wu et al., 2016
	DW-03-3	Mn ore	-7.59	-7.25	Wu et al., 2016
	DW-03-4	Mn ore	-9.04	-8.16	Wu et al., 2016
	DW-03-5	Mn ore	-8.29	-10.05	Wu et al., 2016
	DW-03-7	Mn ore	-9.7	-9.33	Wu et al., 2016
	DW-03-8	Mn ore	-9.07	-9.69	Wu et al., 2016
	DW-03-9	Mn ore	-9.32	-10.61	Wu et al., 2016
	DW-03-10	Mn ore	-8.54	-10.5	Wu et al., 2016
	DW-03-11	Mn ore	-8.54	-11.84	Wu et al., 2016
	DW-12-6	Mn ore	-9.15	-7.25	Wu et al., 2016
	DW-13-2	Mn ore	-9.22	-7.65	Wu et al., 2016
	DW-13-3	Mn ore	-7.34	-6.45	Wu et al., 2016
	DW-02-1	Mn ore	-9.04	-7.51	Wu et al., 2016
	DW-02-3	Mn ore	-9.45	-7.91	Wu et al., 2016
	DW-02-4	Mn ore	-8.81	-7.44	Wu et al., 2016
	DW-02-5	Mn ore	-8.8	-8.61	Wu et al., 2016
	DW-02-6	Mn ore	-9.95	-7.76	Wu et al., 2016
XS	RX-02-1	Mn ore	-6.61	-6.27	Wu et al., 2016
	RX-02-2	Mn ore	-6.52	-6.84	Wu et al., 2016
	RX-02-3	Mn ore	-6.33	-6.74	Wu et al., 2016
	RX-02-5	Mn ore	-8.41	-5.1	Wu et al., 2016
	RX-02-6	Mn ore	-8.63	-5.11	Wu et al., 2016
	RX-02-7	Mn ore	-9.14	-6.56	Wu et al., 2016
	RX-02-8	Mn ore	-7.64	-6.27	Wu et al., 2016
	RX-02-9	Mn ore	-8.56	-5.65	Wu et al., 2016
	RX-02-10	Mn ore	-7.82	-3.59	Wu et al., 2016
	RX-04	Mn ore	-8.47	-5.4	Wu et al., 2016
ML	ML-03-3	Mn ore	-8.33	-7.19	Wu et al., 2016
	ML-05	Mn ore	-9.11	-4.67	Wu et al., 2016
	FY-263	Mn ore	-11.3	-4.4	Tang and Liu, 1999
	FY-268	Mn ore	-10.1	-4.3	Tang and Liu, 1999
	FY-274	Mn ore	-9.6	-6.5	Tang and Liu, 1999
	FY-277	Mn ore	-9.1	-4.7	Tang and Liu, 1999
	FY-284	Mn ore	-8.6	-4.9	Tang and Liu, 1999
	FY-254	Mn ore	-10.8	-5	Tang and Liu, 1999
XT	XT-2-1	Mn ore	-8.51	-6.32	Wu et al., 2016
	XT-2-2	Mn ore	-9.38	-6.06	Wu et al., 2016
	XT-3	Mn ore	-8.4	-6.17	Wu et al., 2016
	XT-6	Mn ore	-6.96	-8.38	Wu et al., 2016
DTP	ZH8	Mn ore	-10.36	-8.75	Zhou, 2007
	ZH7	Mn ore	-10.38	-14.06	Zhou, 2007
	ZH13	Mn ore	-8.14	-9.6	Zhou, 2007
	ZH15	Mn ore	-8.25	-4.37	Zhou, 2007
	ZH3	Mn ore	-9.96	-9.88	Zhou, 2007
	DTP-05	Mn ore	-7.52	-6.59	Wu et al., 2016
	DTP-22	Mn ore	-10.84	-7.69	Wu et al., 2016
	C-1	Mn ore	-10.698	-4.197	Tang and Liu, 1999
	81131	Mn ore	-8.021	-3.747	Tang and Liu, 1999
	81132	Mn ore	-10.03	-4.409	Tang and Liu, 1999
	81133	Mn ore	-10.012	-3.817	Tang and Liu, 1999
	DL40	Mn ore	-8.97	-12.84	Zhou and Du, 2012
	DL39	Mn ore	-7.87	-12.43	Zhou and Du, 2012
	DL38	Mn ore	-8.71	-9.76	Zhou and Du, 2012
	DL37	Mn ore	-8.57	-11.03	Zhou and Du, 2012
	DL36	Mn ore	-8.49	-7.26	Zhou and Du, 2012
	DL35	Mn ore	-9.56	-10.14	Zhou and Du, 2012
	DL34	Mn ore	-8.12	-10.79	Zhou and Du, 2012
	DL33	Mn ore	-9.06	-10.11	Zhou and Du, 2012
	DL32	Mn ore	-9.33	-10.17	Zhou and Du, 2012
	DL31	Mn ore	-9.97	-10.77	Zhou and Du, 2012
	DL30	Mn ore	-9.09	-10.94	Zhou and Du, 2012
	DL29	Mn ore	-8.8	-11.75	Zhou and Du, 2012
	DL28	Mn ore	-9.12	-10.75	Zhou and Du, 2012
	DL27	Mn ore	-9.21	-9.63	Zhou and Du, 2012
	DL26	Mn ore	-9.04	-11.14	Zhou and Du, 2012
	DL25	Mn ore	-7.85	-9.78	Zhou and Du, 2012
	DL23	Mn ore	-8.55	-9.83	Zhou and Du, 2012
	DL22	Mn ore	-8.67	-10.02	Zhou and Du, 2012
	DL21	Mn ore	-8.93	-9.98	Zhou and Du, 2012
	DL20	Mn ore	-8.97	-9.87	Zhou and Du, 2012
	DL19	Mn ore	-9.85	-9.03	Zhou and Du, 2012
	DL18	Mn ore	-10.28	-9.31	Zhou and Du, 2012
	DL17	Mn ore	-8.11	-9.47	Zhou and Du, 2012
	DL16	Mn ore	-7.87	-11.33	Zhou and Du, 2012
	DL15	Mn ore	-8.09	-10.23	Zhou and Du, 2012
	DL14	Mn ore	-8.91	-10.85	Zhou and Du, 2012
	DL13	Mn ore	-7.86	-11.23	Zhou and Du, 2012
	DL12	Mn ore	-9	-12.17	Zhou and Du, 2012
	DL11	Mn ore	-8.09	-12.19	Zhou and Du, 2012
	DL10	Mn ore	-7.66	-12.3	Zhou and Du, 2012
	DL8	Mn ore	-8.87	-11.42	Zhou and Du, 2012
	DL7	Mn ore	-8.1	-12.48	Zhou and Du, 2012
	DL6	Mn ore	-7.91	-12.53	Zhou and Du, 2012
ZLG	YX2-3	Mn ore	-7.9	-7.5	Chen et al., 2008
	YX2-7	Mn ore	-8.3	-5.5	Chen et al., 2008
	YX2-8	Mn ore	-7.5	-6.5	Chen et al., 2008
	YX2-9	Mn ore	-7.8	-11.9	Chen et al., 2008
	YX2-10	Mn ore	-8	-14.1	Chen et al., 2008
	YX2-11	Mn ore	-8.1	-9	Chen et al., 2008
	YX2-15	Mn ore	-6.9	-7.6	Chen et al., 2008
	YX1-3	Mn ore	-9.3	-6.9	Chen et al., 2008
	ML-10	Mn ore	-9	-6.2	Chen et al., 2008
	ZLG-Mn-7	Mn ore	-8.6	-6.3	Chen et al., 2008
	ZLG-Mn-14	Mn ore	-7.9	-7.1	Chen et al., 2008
	ZLG-Mn-16	Mn ore	-7.9	-7	Chen et al., 2008
XXB	ZH10	Mn ore	-9.28	-8.68	Zhou, 2007

## Sheet: References
References for Supplementary File 2
23. Zhou, Q.; Du, Y.S.; Yuan, L.J. Huanan Ancient Natural Gas Seepage Sedimentary-Type Manganese Metallogenesis; Science Press: Beijing, China, 2019. (In Chinese). 95. An, Z.Z.; Zhang, R.B.; Chen. J.C.; Qin, Y.; Pan, W.; Wu, G.W.; Peng, Q.Y.; Zheng, C.; Zhang, F.F.; Zhu, X.K.; Wang, H.B. Geological and geochemical characteristics of Daotuo superlarge manganese ore deposit in Songtao County of Gui…
